# Supplementary material
Source: publisher site journal article supplement (https://www.spandidos-publications.com/2145/downloadSupplementary)
Supplement: Supplementary file 1 [file downloadSupplementary]

## Sheet: Sheet1
Table SII. The results of 22 immune cell infiltration of non-eosinophil polyps, eosinophil polyps and nasal mucosa tissues.
Mixture	B cells naive	B cells memory	Plasma cells	T cells CD8	T cells CD4 naive	T cells CD4 memory resting	T cells CD4 memory activated	T cells follicular helper	T cells regulatory (Tregs)	T cells gamma delta	NK cells resting	NK cells activated	Monocytes	Macrophages M0	Macrophages M1	Macrophages M2	Dendritic cells resting	Dendritic cells activated	Mast cells resting	Mast cells activated	Eosinophils	Neutrophils
Ctrl_1	9.76751	0	17.5435	2.34926	0	47.1181	2.58076	0	0	1.41977	0	0	0.996085	0	2.11769	5.69908	0	1.67218	8.73604	0	0	0
Ctrl_2	10.4683	0	17.48	2.75626	0	43.4988	0.159136	0	0	2.55182	0	0	0	8.86821	1.09331	5.34702	0	0	7.77708	0	0	0
Ctrl_3	0.238053	0	11.0345	15.337	0	46.9613	5.48631	0	0	12.217	0	0	0	0.0733433	4.51516	1.32484	0.463322	0	2.34914	0	0	0
ECRSwNP_1	1.82777	0	19.6733	1.32596	0	25.2224	4.24441	0	0	3.73951	0	0.648096	3.27951	0	0.287116	11.6469	0.158782	1.08061	7.41133	0.0639514	19.3904	0
ECRSwNP_2	4.93317	0	9.63102	0.857802	0	28.9298	1.89455	0	0	2.74066	0	1.02933	5.71628	0	0.650018	13.5204	0	2.79169	19.3331	0	7.97213	0
ECRSwNP_3	4.5721	0	26.0717	0.875198	0	23.3368	1.89001	0	0	1.75523	0	1.09535	4.10979	0	0	12.5204	0	2.31899	11.8447	0	9.40268	0.207014
non-ECRSwNP_1	4.15525	0	22.4408	2.42471	0	25.0704	6.41585	0	0	10.4616	0	0	8.64964	0	6.8998	2.40358	0	0.256125	10.8223	0	0	0
non-ECRSwNP_2	3.08771	0	30.9584	4.36723	0	33.7707	4.21945	0	0	9.686	0	0	0.338268	0	5.98007	2.36658	0.542501	0.170414	4.51272	0	0	0
non-ECRSwNP_3	3.57295	0	20.0613	4.06439	0	30.0156	8.7347	0	0	7.07143	0	0	6.24894	0	8.28959	4.95611	0.0467531	0.872989	5.04814	0	0	1.01712
The percentage of infiltrated cells （%）
